# Supplementary material
Source: PubMed Central journal article supplement (PMC7236226)
Supplement: ml9b00627_si_001.pdf [file ml9b00627_si_001.pdf]

# **Inhibition of Non-Essential Bacterial Targets: Discovery of a Novel Serine *O*-acetyltransferase Inhibitor**

Joana Magalhães,<sup>a</sup> Nina Franko,<sup>b</sup> Samanta Raboni,<sup>b,f</sup> Giannamaria Annunziato,<sup>a</sup> Päivi Tammela,<sup>c</sup>  
Agostino Bruno,<sup>a,†</sup> Stefano Bettati,<sup>d,e,f</sup> Andrea Mozzarelli,<sup>b,e,f</sup> Marco Pieroni,<sup>a,g,\*</sup> Barbara  
Campanini,<sup>b</sup> Gabriele Costantino<sup>a,g,h</sup>

<sup>a</sup>*P4T group, and* <sup>b</sup>*Laboratory of Biochemistry and Molecular Biology Department of Food and Drug, University of Parma, 43124 Parma, Italy;* <sup>c</sup>*Drug Research Program, Division of Pharmaceutical Biosciences, Faculty of Pharmacy, University of Helsinki, P.O. Box 56 (Viikinkaari 5 E), Helsinki, FI-00014, Finland;* <sup>d</sup>*Department of Medicine and Surgery, University of Parma, 43125 Parma, Italy;* <sup>e</sup>*National Institute of Biostructures and Biosystems, Rome, Italy;* <sup>f</sup>*Institute of Biophysics, CNR, Pisa, Italy;* <sup>g</sup>*Centro Interdipartimentale “Biopharmanet-tec”, Università degli Studi di Parma, Parma, Italy;* <sup>h</sup>*Centro Interdipartimentale Misure (CIM) ‘G. Casnati’, University of Parma, Parma, Italy.*  
<sup>†</sup>*Present address: Experimental Therapeutics Program, IFOM – The FIRC Institute for Molecular Oncology Foundation, Via Adamello 16-20139, Milano, Italy.*

## **Supporting information**

|                                                                |              |
|----------------------------------------------------------------|--------------|
| <b><i>Virtual screening</i></b>                                | <b>Pag 2</b> |
| <b><i>Protein expression and purification</i></b>              | <b>Pag 4</b> |
| <b><i>Determination of StSAT inhibition</i></b>                | <b>Pag 5</b> |
| <b><i>Evaluation of MIC</i></b>                                | <b>Pag 6</b> |
| <b><i>Chemistry and synthesis of compound 3</i></b>            | <b>Pag 7</b> |
| <b><i>Structures of compounds from VS and % Inhibition</i></b> | <b>Pag 8</b> |

## Experimental procedures

### *Virtual screening*

#### *X-ray structure selection and preparation*

For this study, we decided to use the X-ray crystal structures of the WT *EcSAT* in complex with cysteine (1T3D) and the structure of WT *HiSAT* in complex with CoA (1SSM). This decision was dictated by two relevant aspects: (i) *EcSAT* and *HiSAT* share with *StSAT* a sequence identity of the 100% at the active site level; (ii) *EcSAT* and *HiSAT* being bound to cysteine and CoA show subtle conformational differences at the active site level. Both X-ray crystal structure were prepared using the protein preparation wizard available in Maestro, which assigns bond orders, adds hydrogen atoms, deletes water molecules, and generates appropriate protonation states (<https://www.schrodinger.com>). The docking grid boxes for both 1T3D and 1SSM were centred in such a way to include all the residues into a 4-Å shell around the substrate cysteine bound in the 1T3D X-ray, with a box size of 26 x 26 x 26 Å<sup>3</sup>.

#### *Libraries preparation*

The sd file of 2-D structures of the compounds were retrieved from the ChemDiv Anti-infective (8523), anti-bacterial (5460), and antiviral (77260) focused library collections, for a total of 91243 compounds. Libraries were merged using Canvas (<https://www.schrodinger.com>) and duplicates were removed. Hydrogen atoms, protonation states at pH 7.4, 3-D conversion of the structures and conformational search were performed at the initial stages of the Virtual Screening Workflow (vsw) available in Maestro by using LigPrep (<https://www.schrodinger.com>). PhysChem properties and related filters such as Lipinski's Rule, reactive functional groups were evaluated by using QuickProp (<https://www.schrodinger.com>).

#### *Virtual Screening Workflow*

Virtual screening was performed by using the multigrid option of the vsw panel available in Maestro. Vsw allowed us to carry out a 3 steps virtual screening. In the first step the HTSV option was used in order to generate as much as possible binding poses for each ligand and the 75% of the best scoring compounds was retained. During the second step, the generated binding poses were refined by using the SP method available in Glide (<https://www.schrodinger.com>) and three binding modes per ligand were generated. In this case, only the 75% of the best scoring compounds was retained. Finally, for each compound a MM-GBSA rescoring protocol was performed, considering for each compound the three binding modes previously generated. In

such a way, we were able to identify the most energetically favorable binding mode for each ligand, and only the top 2.75% of the best scoring compounds was retained, leading to the selection of the final 1.409 virtual hits to be further evaluated by visual inspection.

## Protein expression and purification

The *StSAT* expression vector was generated by insertion of the synthetic gene (GeneArt, ThermoFisher, Waltham, MA USA 02451) into the pSH21p-His6-trxA plasmid (a kind gift from Professor Christopher S. Hayes, MCDB, University of California, Santa Barbara), replacing the insert for *E. coli* SAT. Nucleotide sequence of SAT from *S. Typhimurium*, obtained from Uniprot (entry A0A0U1JK50), was optimized for expression in *E. coli*. The sequence of the new construct was confirmed by sequencing reaction. The expression vector was transformed into competent *E. coli* Tuner™ BL21(DE3) cells (Novagen, Merck Biosciences, Billerica, MA, USA) by electroporation. *StSAT* was expressed and purified as previously described for *EcSAT*<sup>1</sup> with few changes. Briefly, *E. coli* Tuner™ cells transformed with the expression vector were grown overnight and diluted 1:100 in LB added of 150 µg/mL ampicillin and 1 % glucose. Cells were grown at 37 °C and 250 RPM until the midlog phase and induced with 1 mM IPTG for 4 hours. Cells were pelleted and stored at -80 °C. The cell pellet was resuspended in lysis buffer (100 mM Tris, 500 mM NaCl, 50 mM imidazole, 50 µM L-cysteine, 1 mM TCEP, pH = 7.5) in presence of 1 mg/mL lysozyme, 0.2 mM PMSF, 0.2 mM benzamidine and 1.5 µM pepstatin A. Cells were then lysed by pulsed sonication and the protein purified by affinity chromatography on Talon™ resin (Clontech Laboratories, Inc., Mountain View, CA, USA). Endogenous *O*-acetylserine sulfhydrylase bound to SAT was eluted with 10 mM OAS. *StSAT* was eluted with imidazole and the His<sub>6</sub>-trxA tag was cleaved by *in house* produced TEV protease. TEV protease, the cleaved tag and high molecular weight aggregates were removed by size exclusion chromatography using HiLoad 16/600 Superdex 75 prep grade column. The final enzyme preparation was more than 95 % pure based on the SDS-PAGE analysis. *StSAT* concentration was calculated by using an extinction coefficient  $\epsilon_{280}=26930 \text{ M}^{-1} \text{ cm}^{-1}$ .

### **Determination of *Sr*SAT inhibition**

*Sr*SAT inhibitory activity of the 73 commercial compounds acquired was evaluated using an indirect continuous assay (Scheme 1). The assay was previously optimized at 20 °C in a cuvette-format using a Cary 4000 UV-Vis spectrophotometer (Agilent, Santa Clara, CA, USA) equipped with a cuvette holder thermostated through a circulating water bath. The  $K_m$  and  $k_{cat}$  for both substrates and the  $IC_{50}$  for the inhibitor glycine were calculated and compared with data obtained using the direct continuous assay. The assay buffer was 20 mM sodium phosphate, 85 mM NaCl, 1 mM EDTA, pH 7. The enzyme concentration was 7 nM and the concentration of DTNB was 1 mM. The concentration of acetyl-CoA for the determination of the catalytic parameters for L-Ser was 0.25 mM, the concentration of L-Ser was 1 mM. For the determination of the  $IC_{50}$  for glycine, the concentration of the substrates was 0.25 mM and 1 mM for acetyl-CoA and L-Ser, respectively. In all cases, the reaction was initiated by addition of acetyl-CoA to the reaction mixture. The optimized assay was transferred into a 96-well plate format. The only difference with respect to the assay carried out in cuvettes was the addition to the enzyme dilution of 100 µg/mL bovine serum albumin (BSA) and 15% glycerol. The total volume in each well was 200 µL. The absorbance was read at 412 nm using a Multiskan Go plate reader (Thermo Fisher Scientific, Finland). The plates were measured 12 times: first one background determination and then every 27s during about 5 min. The reaction was started with the addition of the substrate acetyl-CoA and % of inhibition for each compound was calculated at time-point 180s, which was selected as the endpoint based on assay quality parameters S/B, SW and Z'. First, the inhibitory potency against *Sr*SAT was tested at 100 µM, then compounds with a percentage of inhibition equal or higher than 40% were re-tested at the same concentration. Finally, dose-response curves were performed to determine  $IC_{50}$  for all the compounds that showed a percentage of inhibition higher than 50% in the two screenings at 100 µM.

## **Evaluation of MIC**

Minimal inhibitory concentration (MIC) was determined by the broth microdilution assay according to CLSI guidelines.<sup>2</sup> Briefly, *E. coli* ATCC25922 (obtained from Microbiologics Inc., USA) was grown at 37°C on MHB agar plates for 16-24h. A loopful of bacteria was transferred into 5 mL saline and the turbidity of the suspension was measured with a densitometer, and suspension with  $1 \times 10^6$  colony-forming units (CFU)/mL was prepared into assay media. Compounds were dissolved in DMSO and 2-fold dilution series (10 concentrations) starting from 128 µg/mL were prepared. Ciprofloxacin was used as standard antibiotic and each plate contained growth control wells and sterility check wells. The plates were incubated at 37°C for 16h-24h and MIC was defined as the lowest concentration at which the bacterial growth was inhibited by >90%.

## **References**

- (1) Benoni, R.; Bei, O. D.; Paredi, G.; Hayes, C. S.; Franko, N.; Mozzarelli, A.; Bettati, S.; Campanini, B. Modulation of Escherichia Coli Serine Acetyltransferase Catalytic Activity in the Cysteine Synthase Complex. *FEBS Lett.* 2017, 591 (9), 1212–1224. <https://doi.org/10.1002/1873-3468.12630>.
- (2) CLSI, *Methods for Dilution Antimicrobial Susceptibility Tests for Bacteria That Grow Aerobically*, Approved Standard—Ninth Edition, CLSI document - (accessed Dec 14, 2019).

## Chemistry and synthesis of compound 3

### Chemistry

Compound **3** was resynthesized in order to confirm the previously obtained results with the commercial sample (Scheme 2). Briefly, 1,2,3-thiadiazole-4-carboxylic acid was synthesized as previously reported starting from pyruvic acid that gives hydrazone **10** upon treatment with  $\text{SOCl}_2$  and ethyl hydrazinecarboxylate in ethanol.<sup>3</sup> Ethyl 2-(1-ethoxy-1-oxopropan-2-ylidene)hydrazinecarboxylate is then reacted with  $\text{SOCl}_2$  to give ethyl 1,2,3-thiadiazole-4-carboxylate **11** in good yield, that is hydrolyzed to the corresponding acid. Acid **11** is activated with 1,1'-Carbonyldiimidazole (CDI) for 1h and then 4-nitrothiazol-2-amine was added to the reaction mixture to give compound **3** in good yields. HRMS (ESI) calculated for  $\text{C}_6\text{H}_3\text{N}_5\text{O}_3\text{S}_2$   $[\text{M} + \text{H}]^+$  257,9677, found 257.9589

Compounds **3-8** were tested as 95–100% purity samples (by HPLC/MS). HPLC/MS experiments were performed with HPLC: Agilent 1100 series, equipped with a Waters Symmetry C18, 3.5  $\mu\text{m}$ , 4.6 mm x 75 mm column and MS: Applied Biosystem/MDS SCIEX, with API 150EX ion source. HRMS experiments were performed with LTQ ORBITRAP XL THERMO.

### Scheme 2<sup>a</sup> Synthesis of compound 3

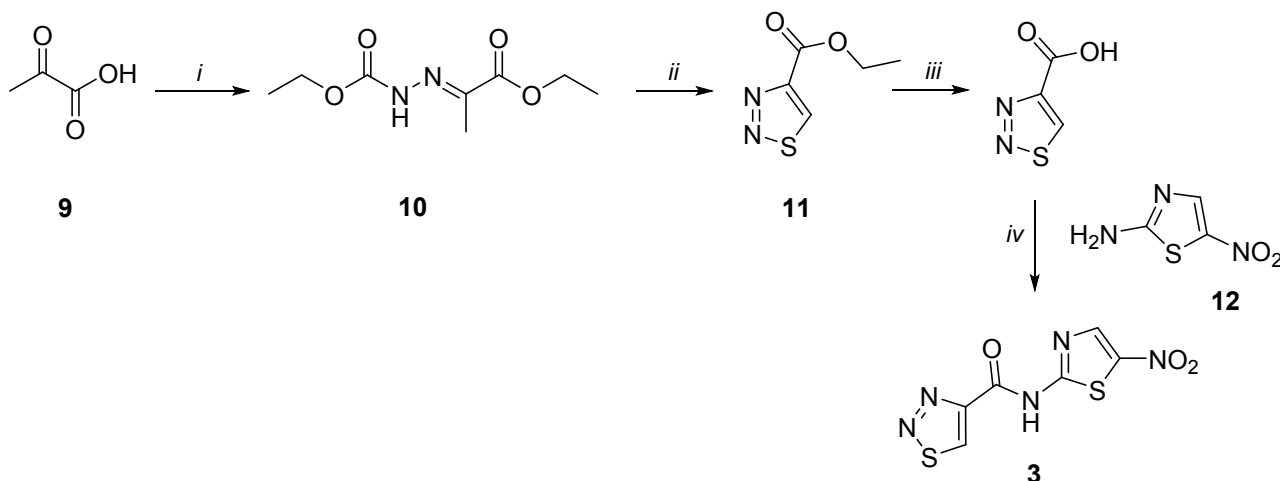

<sup>a</sup>Reagents and conditions: *i*) EtOH,  $\text{SOCl}_2$ , ethyl hydrazinecarboxylate, 61%; *ii*) DCM,  $\text{SOCl}_2$ ; 39%; *iii*) NaOH 2N, MeOH; 38%; *iv*) CDI, DMF, 4-nitrothiazol-2-amine, 15%.

(3) Hurd, C. D.; Mori, R. I. On Acylhydrazones and 1,2,3-Thiadiazoles. *J. Am. Chem. Soc.* **1955**, 77 (20), 5359–5364. <https://doi.org/10.1021/ja01625a047>.

*Structures of compounds from VS*

| Compound ID | Molecular formula                                                            | Structure                                                                           | % inhibition @ 100 $\mu$ M |
|-------------|------------------------------------------------------------------------------|-------------------------------------------------------------------------------------|----------------------------|
| 3382-1221   | C <sub>21</sub> H <sub>16</sub> N <sub>2</sub> O <sub>2</sub> S <sub>2</sub> | 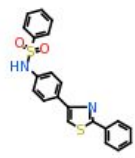   | 22,20082018                |
| 4577-0157   | C <sub>23</sub> H <sub>24</sub> N <sub>2</sub> O <sub>4</sub> S              |    | 60,09071704                |
| 4577-2315   | C <sub>22</sub> H <sub>22</sub> N <sub>2</sub> O <sub>3</sub> S              |   | 29,94904934                |
| C450-0514   | C <sub>23</sub> H <sub>35</sub> N <sub>3</sub> O <sub>4</sub> S              |  | 39,18230396                |
| C567-0505   | C <sub>25</sub> H <sub>20</sub> FNO <sub>3</sub>                             |  | 21,17559339                |
| C567-0562   | C <sub>24</sub> H <sub>17</sub> F <sub>2</sub> NO <sub>2</sub>               |  | 45,30881074                |
| C583-0084   | C <sub>22</sub> H <sub>27</sub> N <sub>3</sub> O <sub>3</sub> S <sub>2</sub> |  | 19,51451887                |



|           |              |                                                                                     |              |
|-----------|--------------|-------------------------------------------------------------------------------------|--------------|
| D035-0097 | C7H7N5O2S2   | 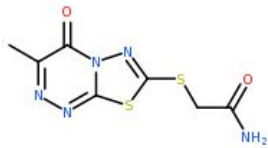   | 15,90965577  |
| D271-0196 | C19H22N4O5S  |    | -6,84105878  |
| D271-0197 | C20H24N4O5S  |    | 16,5154716   |
| D271-0198 | C20H22N4O5S  |   | -13,78774699 |
| D271-0201 | C24H24N4O5S  |  | 47,25984839  |
| D271-0206 | C24H23FN4O5S |  | 39,66695663  |
| D271-0344 | C19H22N4O5S  |  | 11,28785054  |
| D271-0348 | C23H22N4O5S  |  | 42,10886044  |

|           |              |                                                                                     |              |
|-----------|--------------|-------------------------------------------------------------------------------------|--------------|
| D271-0352 | C23H21FN4O5S |    | 53,14195767  |
| D271-0353 | C23H21FN4O5S |    | 20,59773829  |
| D315-1293 | C25H28N4O4S  |    | 27,32074065  |
| D319-0482 | C6H3N5O3S2   |    | 86,19998813  |
| D319-0733 | C7H5N5O3S2   |  | 84,67935518  |
| D389-0064 | C18H20N6O3   |  | -21,70918896 |
| D389-0402 | C25H25N5O3   |  | 14,0952776   |
| D389-0566 | C20H24N6O3   |  | -16,05890894 |

|           |                                                                 |                                                                                      |              |
|-----------|-----------------------------------------------------------------|--------------------------------------------------------------------------------------|--------------|
| D389-1113 | C <sub>20</sub> H <sub>25</sub> N <sub>5</sub> O <sub>3</sub>   | 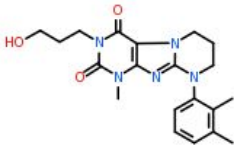    | -25,24372537 |
| D389-1155 | C <sub>20</sub> H <sub>25</sub> N <sub>5</sub> O <sub>3</sub>   |     | -11,64488695 |
| D392-0248 | C <sub>18</sub> H <sub>20</sub> N <sub>4</sub> O <sub>4</sub> S |     | 35,99668119  |
| D392-0319 | C <sub>18</sub> H <sub>18</sub> N <sub>4</sub> O <sub>4</sub> S |    | 66,23107239  |
| D395-0021 | C <sub>27</sub> H <sub>26</sub> N <sub>4</sub> O <sub>3</sub>   |   | 8,276291226  |
| D509-0021 | C <sub>22</sub> H <sub>21</sub> N <sub>5</sub> O <sub>5</sub> S |   | -8,433934868 |
| D511-0020 | C <sub>19</sub> H <sub>20</sub> N <sub>4</sub> O <sub>6</sub> S |   | 51,23003526  |
| D511-0060 | C <sub>18</sub> H <sub>18</sub> N <sub>4</sub> O <sub>5</sub> S |  | 77,50674134  |

|           |                                                                   |                                                                                     |              |
|-----------|-------------------------------------------------------------------|-------------------------------------------------------------------------------------|--------------|
| D511-0063 | C <sub>18</sub> H <sub>18</sub> N <sub>4</sub> O <sub>4</sub> S   | 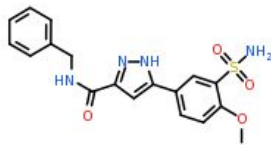   | 72,28790707  |
| D715-1491 | C <sub>21</sub> H <sub>19</sub> NO <sub>7</sub>                   |    | 22,67164489  |
| E018-1781 | C <sub>22</sub> H <sub>19</sub> N <sub>3</sub> O <sub>2</sub> S   |    | -18,16635553 |
| E726-0325 | C <sub>19</sub> H <sub>24</sub> N <sub>4</sub> O <sub>5</sub> S   |   | -3,356150176 |
| E726-0340 | C <sub>18</sub> H <sub>21</sub> ClN <sub>4</sub> O <sub>4</sub> S |  | 12,80647169  |
| F151-0066 | C <sub>21</sub> H <sub>21</sub> N <sub>5</sub> O <sub>3</sub> S   |  | -8,442231902 |
| F151-0171 | C <sub>22</sub> H <sub>23</sub> N <sub>5</sub> O <sub>3</sub> S   |  | 20,6388716   |
| F151-0200 | C <sub>25</sub> H <sub>23</sub> N <sub>5</sub> O <sub>3</sub> S   |  | 48,35926156  |

|           |              |                                                                                     |              |
|-----------|--------------|-------------------------------------------------------------------------------------|--------------|
| F151-0341 | C21H21N5O3S  | 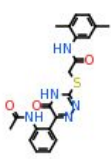   | -43,01597179 |
| F731-0396 | C19H20N2O3   |    | -7,104125953 |
| G414-1520 | C17H22N6O3   |    | -38,38870386 |
| G547-0536 | C21H16N4O3S  |    | -8,904241557 |
| G568-0166 | C25H28N4O3S  |   | 24,14191737  |
| G568-0266 | C25H19FN4O2S |  | 32,41033828  |
| G620-0245 | C26H24N4O4S  |  | 24,8355399   |
| G620-0334 | C24H26N4O3S  |  | 27,14761498  |
| G642-7235 | C27H20ClN3O4 |  | 8,161074564  |

|           |               |                                                                                     |              |
|-----------|---------------|-------------------------------------------------------------------------------------|--------------|
| G748-0005 | C22H19N5O2S   | 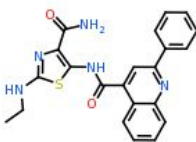   | -5,254465883 |
| G748-0011 | C21H17BrN6O2S |    | -22,84825631 |
| G754-0211 | C20H15N5O4S   |    | 38,05840742  |
| G786-1280 | C11H10N6O2S2  |    | -1,505601277 |
| G788-0625 | C26H26N4O2S   |  | 21,53257549  |
| G856-3815 | C9H10N4O3S2   |  | -19,73245988 |
| G856-3819 | C11H12N4O4S2  |  | -6,872918444 |
| G857-0596 | C16H11FN4O4S  |  | -6,085711926 |
| G907-1063 | C25H31N3O     |  | 14,49175635  |

|           |                |                                                                                     |              |
|-----------|----------------|-------------------------------------------------------------------------------------|--------------|
| J041-0001 | C20H17ClFN5O3S | 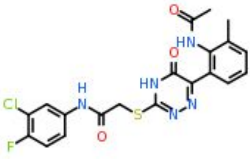   | 8,612479701  |
| J041-0002 | C20H17F2N5O3S  |    | 1,654234676  |
| J041-0004 | C20H17F2N5O3S  |    | -2,760727753 |
| J041-0011 | C20H18FN5O3S   |    | -6,764229998 |
| J041-0012 | C20H18FN5O3S   |  | -22,25844623 |
| J041-0024 | C21H21N5O3S    |  | -2,238643773 |
| J041-0026 | C21H21N5O3S    |  | -18,8920283  |
| J041-0040 | C22H23N5O3S    |  | 3,112849864  |
| J041-0057 | C22H21N5O3S    |  | 27,79830472  |

|           |                                                                  |                                                                                     |              |
|-----------|------------------------------------------------------------------|-------------------------------------------------------------------------------------|--------------|
| J041-0062 | C <sub>21</sub> H <sub>21</sub> N <sub>5</sub> O <sub>3</sub> S  | 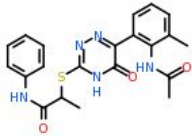   | -9,237122365 |
| Y040-1915 | C <sub>20</sub> H <sub>13</sub> FO <sub>3</sub>                  |    | 21,83341786  |
| Y040-2426 | C <sub>19</sub> H <sub>16</sub> F <sub>2</sub> O <sub>3</sub>    |    | 11,444372    |
| Y041-3100 | C <sub>23</sub> H <sub>24</sub> N <sub>4</sub> O <sub>4</sub> S  |    | 36,28921249  |
| Z601-7550 | C <sub>17</sub> H <sub>17</sub> N <sub>3</sub> O <sub>2</sub>    |   | 5,812746021  |
| D717-0037 | C <sub>7</sub> H <sub>4</sub> BrN <sub>3</sub> O <sub>2</sub>    |  | -15,59805839 |
| E726-0389 | C <sub>16</sub> H <sub>17</sub> FN <sub>4</sub> O <sub>3</sub> S |  | -7,324494675 |
| G642-7324 | C <sub>24</sub> H <sub>18</sub> N <sub>4</sub> O <sub>2</sub>    |  | -40,70854162 |
